# Supplementary material
Source: PubMed Central journal article supplement (PMC3133309)
Supplement: supp_193_14_3446__1.pdf [file supp_193_14_3446__1.pdf]

0.1/site

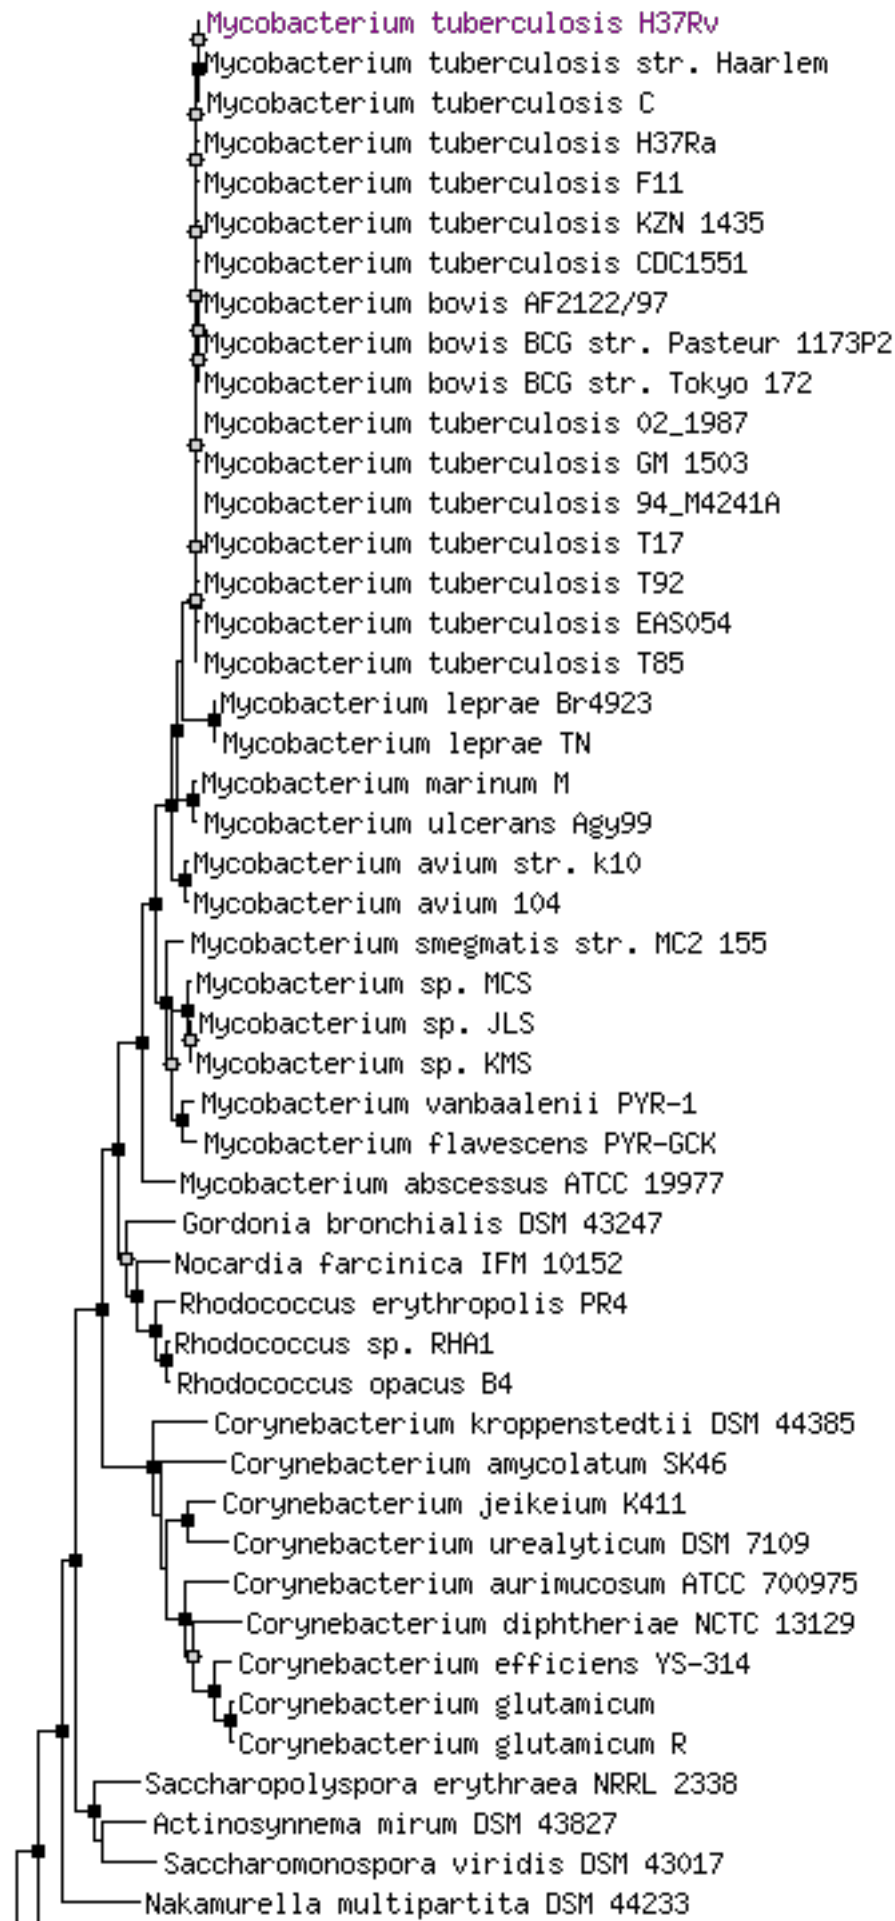

Figure S1. Phylogenetic tree of all studied species.

Produced by MicrobesOnline (<http://microbesonline.org/cgi-bin/speciesTree.cgi?taxId=83332>).
